# Supplementary material for: Novel double-cathode configuration to improve the cycling stability of lithium–sulfur battery
Source: Royal Society of Chemistry journal article supplement (doi:10.1039/c4ra15328f), 2015-01-01
Supplement: c4ra15328f1.pdf [file c4ra15328f1.pdf]

### Supplementary Information for:

## Novel double-cathode configuration to improve cycling stability of lithium-sulfur battery

Chao Wu, Lixua Yuan\*, Zhen Li, Ziqi Yi, Yanrong Li, Rui Zeng, Wei Zhang, Yunhui Huang\*

Key Laboratory for Advanced Battery Materials and System (MOE), School of Materials Science and Engineering, Huazhong University of Science and Technology, Wuhan, Hubei 430074, China. Tel./fax: +86 2787558421 (Yunhui Huang). Email: [huangyh@mail.hust.edu.cn](mailto:huangyh@mail.hust.edu.cn) (Yunhui Huang), [yuanlixia@mail.hust.edu.cn](mailto:yuanlixia@mail.hust.edu.cn) (Lixia Yuan).

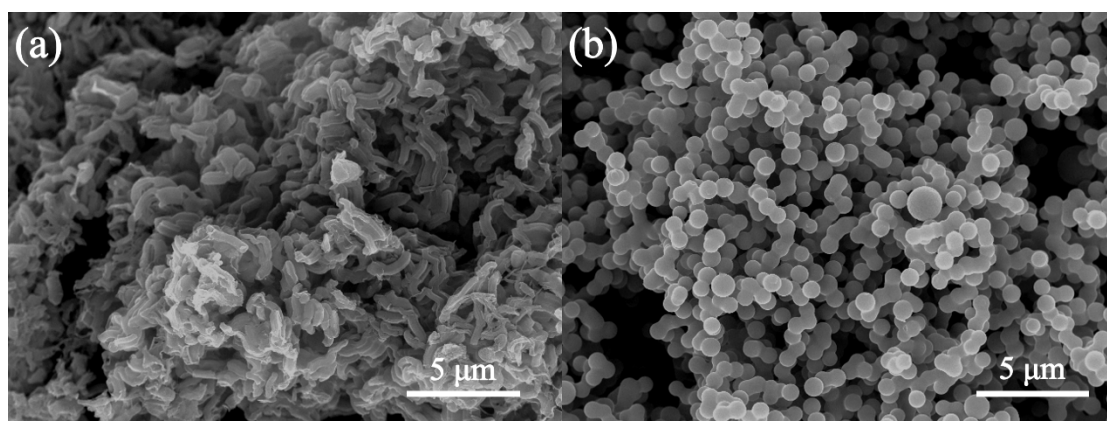

Fig. S1 SEM images of (a) CMK-3 purchased and (b) MiPCS synthesized.

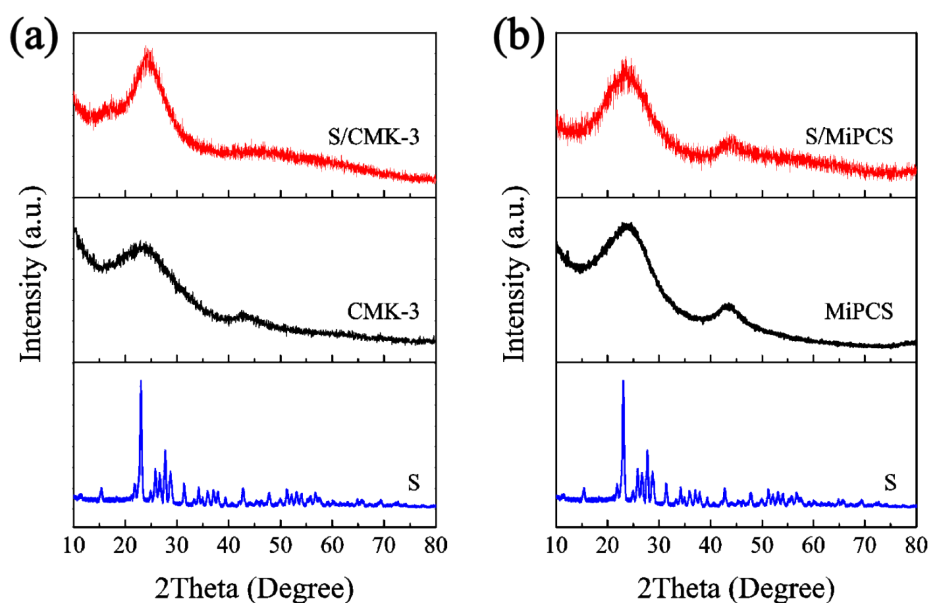

Fig. S2 XRD patterns of pristine S, CMK-3, S/CMK-3, MiPCS and S/MiPCS.

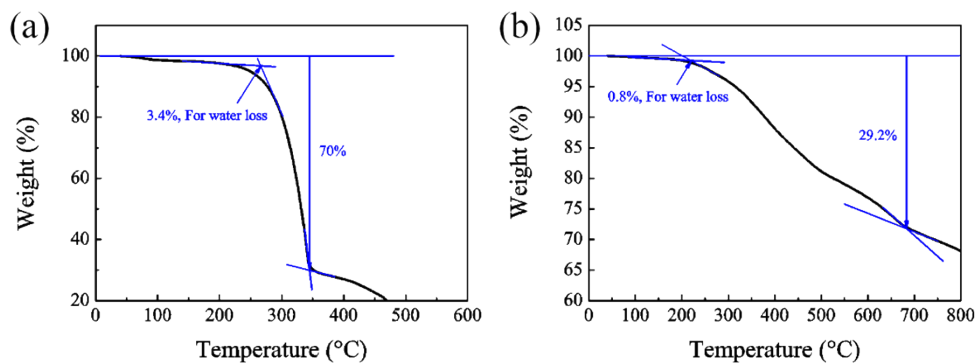

**Fig. S3** Thermo-gravimetric analysis (TGA) of (a) S/CMK-3 and (b) S/MiPCS.

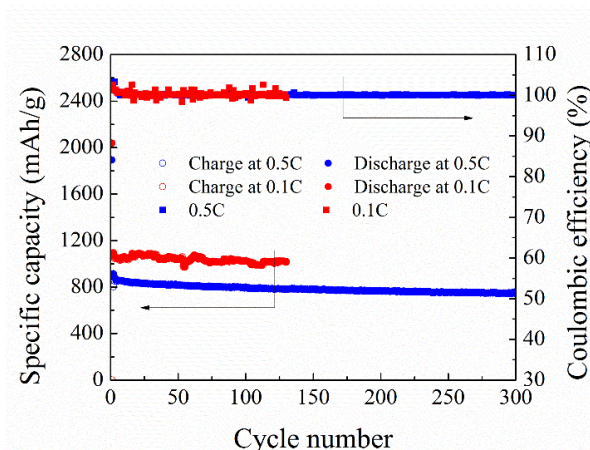

**Fig. S4** Cycling performance of the S/MiPCS cell at 0.1C and 0.5C at 1.0–3.0 V.

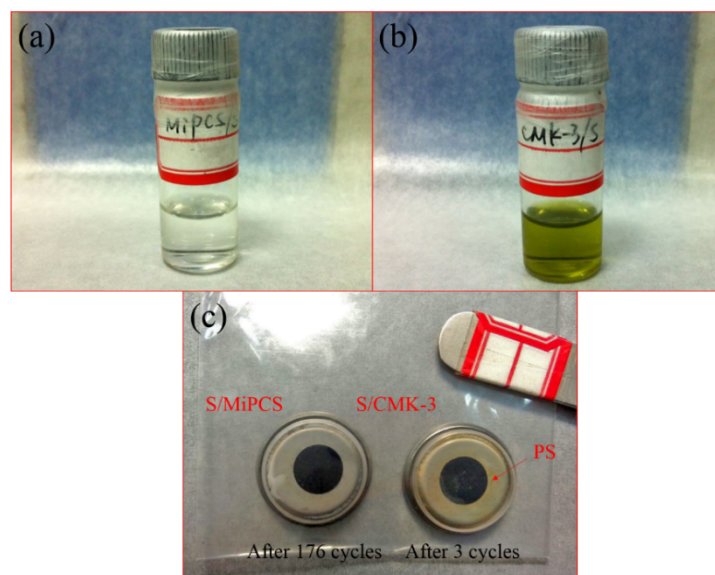

**Fig. S5** Electrolyte of (a) S/MiPCS and (b) S/CMK-3 cathodes collected from cycled cells at 0.2C between 1–3 V after 3 cycles. (c) Disassembled cells of S/MiPCS and S/CMK-3.

Three S/CMK-3 cells and S/MiPCS cells were disassembled to collect electrolyte for considering different sulfur loading. Both of them were washed with 2 ml DME, and 1.5 ml was stored in a transparent 5 ml glass bottle.

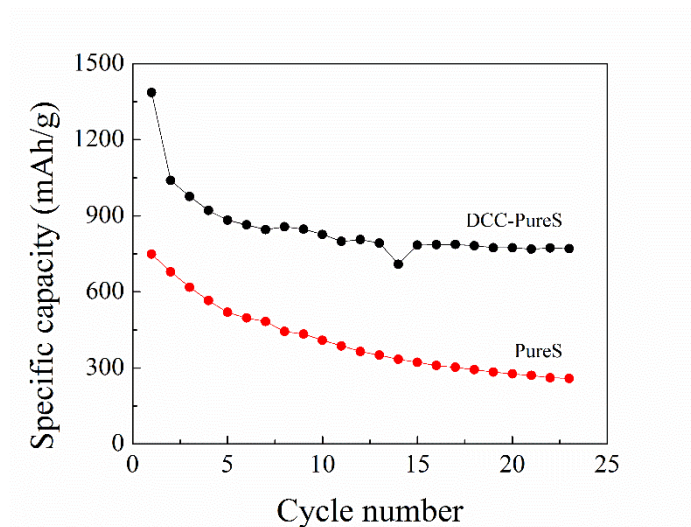

**Fig. S6** Cycling performance comparison of the PureS cathode cell and DCC-PureS.

**Table S1** Comparison of specific capacity of S/CMK-3 cathode, S/MiPCS cathode and DCC.

|                                                      | S/CMK-3 cathode | S/MiPCS cathode | DCC(S/CMK-3@S/MiPCS) cathode |
|------------------------------------------------------|-----------------|-----------------|------------------------------|
| Mass specific capacity (mAh/g) (0.5C)                | 400             | 190             | 320                          |
| Area specific capacity (mAh/cm <sup>2</sup> ) (0.5C) | 1.15            | 0.29            | 1.34                         |

Gravimetric specific capacity is based on the mass of S/C, super P and binder.
